# Supplementary material for: DNA Damage-Response Pathway Heterogeneity of Human Lung Cancer A549 and H1299 Cells Determines Sensitivity to 8-Chloro-Adenosine
Source: Int J Mol Sci. 2018 May 28;19(6):1587. doi: 10.3390/ijms19061587 (PMC6032248; doi:10.3390/ijms19061587)
Supplement: Supplementary file 1 [file ijms-19-01587-s001.pdf]

## Supplementary Materials

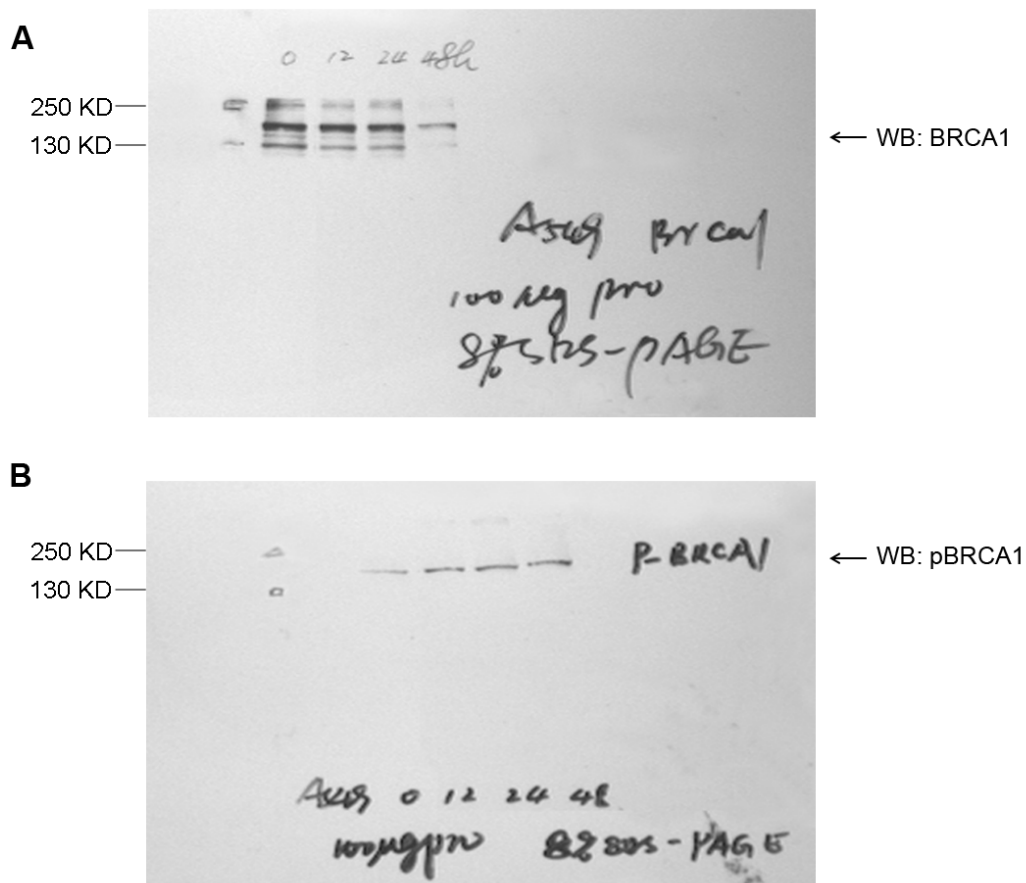

**Figure S1.** Western blotting for BRCA1/pBRCA1 in A549 cells in Figure 7C. A549 cells were exposed to 2  $\mu$ M 8-Cl-Ado for the indicated time points (hours). The BRCA1 (A) and pBRCA1 (B) were analyzed by Western blotting.
